# Supplementary material
Source: PubMed Central journal article supplement (PMC5672802)
Supplement: NIHMS914352-supplement-Supplemental_materials.pdf [file NIHMS914352-supplement-Supplemental_materials.pdf]

SUPPORTING INFORMATION

# **Injectable Carbon Nanotube-Functionalized Reverse Thermal Gel Promotes Cardiomyocytes Survival and Maturation**

*Brisa Peña<sup>1</sup>, Susanna Bosi<sup>2</sup>, Brian A. Aguado<sup>3</sup>, Daniele Borin<sup>4</sup>, Nikki L. Farnsworth<sup>5</sup>, Evgenia Dobrinskikh<sup>6</sup>, Teisha J. Rowland<sup>1</sup>, Valentina Martinelli<sup>7</sup>, Mark Jeong<sup>1</sup>, Matthew R. G. Taylor<sup>1</sup>, Carlin S. Long<sup>1</sup>, Robin Shandas<sup>5</sup>, Orfeo Sbaizero<sup>4</sup>, Maurizio Prato<sup>2,8,9</sup>, Kristi S. Anseth<sup>3</sup>, Daewon Park<sup>5\*</sup> and Luisa Mestroni<sup>1\*</sup>*

<sup>1</sup> Cardiovascular Institute, University of Colorado Denver Anschutz Medical Campus, School of Medicine, Division of Cardiology, at 12700 E.19th Avenue, Bldg. P15, Aurora, Colorado, 80045, United States.

<sup>2</sup> Department of Chemical and Pharmaceutical Sciences, University of Trieste, Via Giorgieri 1, Trieste, 34127, Italy.

<sup>3</sup> Department of Chemical and Biological Engineering and Howard Hughes Medical Institute and the BioFrontiers Institute, University of Colorado at Boulder, 3415 Colorado Avenue, Boulder, Colorado, 80309, United States.

<sup>4</sup> Department of Engineering and Architecture, University of Trieste at Via Valerio 2, Trieste, 34127, Italy.

<sup>5</sup> Bioengineering Department, University of Colorado Denver Anschutz Medical Campus, at Bioscience 2 1270 E. Montview Avenue, Suite 100, Aurora, Colorado, 80045, United States.

<sup>6</sup> University of Colorado Denver Anschutz Medical Campus, Department of Medicine, at 12700 E. 19th Avenue, Bldg. P15, Aurora, Colorado, 80045, United States.

<sup>7</sup> International Center for Genetic Engineering and Biotechnology (I.C.G.E.B.) Area Science Park, Padriciano 99, Trieste, 34149, Italy.

<sup>8</sup> Carbon Nanobiotechnology Laboratory CIC biomaGUNE, Paseo de Miramón 182 20009 Donostia-San Sebastián, 20009, Spain.

<sup>9</sup> Basque Fdn Sci, Ikerbasque, Bilbao 48013, Spain.

**\*Corresponding authors:**

Daewon Park: Department of Bioengineering, University of Colorado Denver Anschutz Medical Campus, 12800 E. 19th Avenue, Aurora CO 80045, Tel. 303-724-6947, Email: daewon.park@ucdenver.edu.

Luisa Mestroni: Cardiovascular Institute, University of Colorado Denver Anschutz Medical Campus, 12700 E. 19th Avenue, Aurora CO 80045, Tel. 303-724-0858, Email: luisa.mestroni@ucdenver.edu.

## Figures

**100 mg of Commercial  
MWCNT-COOH in 20 mL of  
DMF after 30m min of  
sonication**

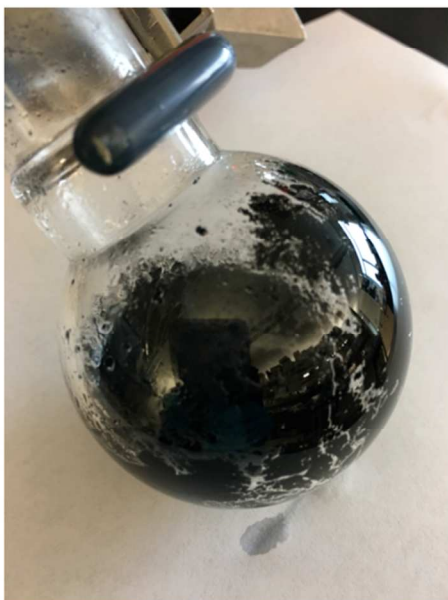

**100 mg of our MWCNT-COOH  
in 20 mL of DMF after 30m  
min of sonication**

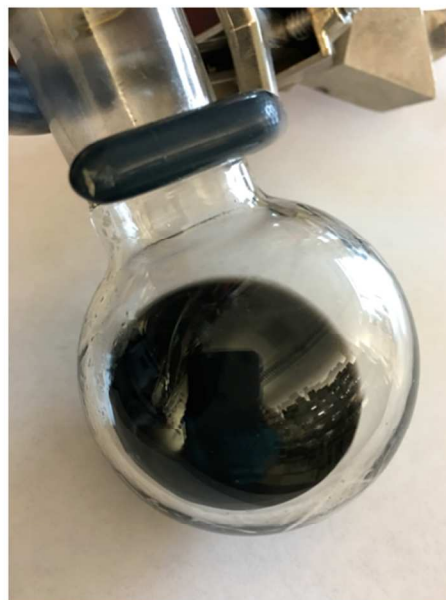

Figure S1: Different MWCNT-COOH dispersed in DMF. From left to right: commercial MWCNT-COOH and our home-synthesized MWCNT-COOH.

## Videos

Video S1: Sol to gel phase transition injection at 37°C of the RTG-lysine system using a 31 Gauge needle. Injection is made in water and polymer were dissolved in water at 1.5% (w/w).

Video S2: Sol to gel phase transition injection at 37°C of the RTG-CNT system using a 31 Gauge needle. Injection is made in water and polymer were dissolved in water at 1.5% (w/w).

Video S3: Spontaneous intracellular calcium oscillations of NRVM cultured for 21 days in the 3D RTG-CNT scaffold.

Video S4: Spontaneous intracellular calcium oscillations of NRVM cultured for 21 days in the 3D RTG-lysine scaffold.

Video S5: Spontaneous intracellular calcium oscillations of NRVM cultured for 21 days in 2D gelatin control.
